# Supplementary material for: In-silico dynamic analysis of cytotoxic drug administration to solid tumours: Effect of binding affinity and vessel permeability
Source: PubMed Central journal article supplement (PMC6193741; doi:10.1371/journal.pcbi.1006460), 2018-10-08
Supplement: pcbi.1006460.s021.pdf [file pcbi.1006460.s021.pdf]

## SUPPORTING INFORMATION

### In-silico Dynamic Analysis of Cytotoxic Drug Administration to Solid Tumours: Effect of Binding Affinity and Vessel Permeability

Vasileios Vavourakis, Triantafyllos Stylianopoulos, Peter A. Wijeratne

#### Fluid mechanics model parameters

List of model parameters associated with the *Fluid Solver Module* (see Fig 1). Cells marked with an asterisk denote shared values for both tissue types, while “VSC” denotes blood vessel and “LMP” denotes the lymphatic vessel.

| Parameter                                                    | Description                                        | Host       | Tumour     | Source    |
|--------------------------------------------------------------|----------------------------------------------------|------------|------------|-----------|
| [mm-Hg]                                                      | VSC Inlet: prescribed pressure                     | 25.        | *          | [1]       |
| [mm-Hg]                                                      | VSC Outlet: prescribed pressure                    | 10.        | *          | [1]       |
| $\mu_B$ [mm-Hg s]                                            | blood viscosity                                    | $3.e-5$    | *          | [2]       |
| $\mu_P$ [mm-Hg s]                                            | blood plasma viscosity                             | $1.125e-5$ | *          | [3]       |
| $\mu_I$ [mm-Hg s]                                            | interstitial fluid viscosity                       | $2.625e-5$ | *          | [3]       |
| $S_{vsc}$ [cm <sup>-1</sup> ]                                | VSC density                                        | 70.        | 200.       | [4–6]     |
| $K_{int-\{T H\}}$ [cm <sup>2</sup> (mm-Hg s) <sup>-1</sup> ] | hydraulic conductivity of the interstitium         | $8.51e-9$  | $2.5e-7$   | [7–9]     |
| $K_{lmp} S_{lmp}$ [(mm-Hg s) <sup>-1</sup> ]                 | specific hydraulic permeability at LMP wall        | $1.333e-5$ | $1.333e-9$ | this work |
| $\sigma_o$ [-]                                               | average osmotic reflection coefficient at VSC wall | 0.91       | $8.7e-5$   | [10–12]   |
| $\pi_{vsc}$ [mm-Hg]                                          | plasma osmotic pressure at VSC wall                | 20.        | 19.3       | [12, 13]  |
| $\pi_{int}$ [mm-Hg]                                          | interstitial fluid osmotic pressure                | 10.        | 17.3       | [12, 14]  |
| $p_{int}$ [mm-Hg]                                            | average IFP: initial value                         | 0.1        | *          | [15]      |

#### References

1. Wu J, Xu S, Long Q, Collins MW, König CS, Zhao G, et al. Coupled modeling of blood perfusion in intravascular, interstitial spaces in tumor microvasculature. *Journal of Biomechanics*. 2008;41(5):996–1004. doi:10.1016/j.jbiomech.2007.12.008.
2. Fung YC. *Biomechanics: Motion, Flow, Stress and Growth*. New York, NY: Springer; 1990.
3. Chen CT, Malkus DS, Vanderby R. A fiber matrix model for interstitial fluid flow and permeability in ligaments and tendons. *Biorheology*. 1998;35(2):103–118. doi:10.1016/S0006-355X(99)80001-8.
4. Hilmas DE, Gillette EL. Morphometric analyses of the microvasculature of tumors during growth and after X-irradiation. *Cancer*. 1974;33(1):103–110.

- 
5. Jain RK. Transport of molecules across tumor vasculature. *Cancer Metastasis Rev.* 1987;6:559–594.
  6. Soltani M, Chen P. Numerical Modeling of Fluid Flow in Solid Tumors. *PLoS ONE.* 2011;6(6):e20344. doi:10.1371/journal.pone.0020344.
  7. Swabb EA, Wei J, Gullino PM. Diffusion and Convection in Normal and Neoplastic Tissues. *Cancer Research.* 1974;34(10):2814–2822.
  8. Jain RK. Transport of molecules in the tumor interstitium: A review. *Cancer Research.* 1987;47:3039–3051.
  9. Netti PA, Berk DA, Swartz MA, Grodzinsky AJ, Jain RK. Role of Extracellular Matrix Assembly in Interstitial Transport in Solid Tumors. *Cancer Research.* 2000;60(9):2497–2503.
  10. Ballard K, Perl W. Osmotic reflection coefficients of canine subcutaneous adipose tissue endothelium. *Microvascular Research.* 1978;16(2):224–236.
  11. Curry FE. *Handbook of Physiology, Section 2: The Cardiovascular System.* Bethesda, MD: American Physiological Society; 1984. p. 309–374.
  12. Jain RK, Tong RT, Munn LL. Effect of vascular normalization by antiangiogenic therapy on interstitial hypertension, peritumor edema, and lymphatic metastasis: Insights from a mathematical model. *Cancer Research.* 2007;67(6):2729–2735. doi:10.1158/0008-5472.CAN-06-4102.
  13. Brace RA, Guyton AC. Interaction of transcapillary Starling forces in the isolated dog forelimb. *American Journal of Physiology - Heart and Circulatory Physiology.* 1977;233(1):H136–H140.
  14. Baxter LT, Jain RK. Transport of fluid and macromolecules in tumors. I. Role of interstitial pressure and convection. *Microvascular Research.* 1989;37(1):77–104. doi:10.1016/0026-2862(89)90074-5.
  15. Vavourakis V, Wijeratne PA, Shipley R, Loizidou M, Stylianopoulos T, Hawkes DJ. A Validated Multiscale In-Silico Model for Mechano-sensitive Tumour Angiogenesis and Growth. *PLOS Computational Biology.* 2017;13(1):e1005259. doi:10.1371/journal.pcbi.1005259.
