# Supplementary material for: In-silico dynamic analysis of cytotoxic drug administration to solid tumours: Effect of binding affinity and vessel permeability
Source: PubMed Central journal article supplement (PMC6193741; doi:10.1371/journal.pcbi.1006460), 2018-10-08
Supplement: pcbi.1006460.s022.pdf [file pcbi.1006460.s022.pdf]

## SUPPORTING INFORMATION

### In-silico Dynamic Analysis of Cytotoxic Drug Administration to Solid Tumours: Effect of Binding Affinity and Vessel Permeability

Vasileios Vavourakis, Triantafyllos Stylianopoulos, Peter A. Wijeratne

#### Vascular network model parameters

List of model parameters associated with the *Vascular Network Module* (see Fig 1). Parameters with a star ( $\star$ ) correspond to non-perfused or hypo-perfused vessels, while those with a dagger ( $\dagger$ ) correspond to well-perfused vessels. The parameters with a double dagger ( $\ddagger$ ) denote the pre-set parameter values of the original vascular network, while the cell marked with an asterisk denotes shared value for both tissue types.

| Parameter                                   | Description                                                                                                    | Host                                        | Tumour | Source |
|---------------------------------------------|----------------------------------------------------------------------------------------------------------------|---------------------------------------------|--------|--------|
| $k_\tau$ [m]                                | chemotaxis in angiogenesis                                                                                     | 1.                                          |        | [1]    |
| $k_\epsilon$ [m]                            | haptotaxis in angiogenesis                                                                                     | 0.3                                         |        | [1]    |
| $k_m$ [Pa <sup>-1</sup> ]                   | mechanotaxis in angiogenesis                                                                                   | 0.01                                        |        | [1]    |
| $\tilde{R}$ [ $\mu\text{m}$ ]               | see Eq (16) in [1]                                                                                             | 4.                                          |        | [2]    |
| $v_{v-0}, v_{v-1}$ [ $\mu\text{m d}^{-1}$ ] | see Eq (16) in [1]                                                                                             | 5.5, 479.7                                  |        | [2]    |
| $v_{v-\text{max}}$ [ $\mu\text{m d}^{-1}$ ] |                                                                                                                | 250.                                        |        | [1, 2] |
| $\tau^*$ [-]                                | TAF threshold above which angiogenesis occurs                                                                  | 0.01                                        |        | [1]    |
| $\mu_D, \sigma_D$ [ $\mu\text{m}$ ]         | median and standard deviation of distance-related probability function $\mathcal{P}_D$                         | $150. \pm 15^\star, 300. \pm 30^\dagger$    |        | [1]    |
| $\mu_A, \sigma_A$ [d]                       | median and standard deviation of age-related probability function $\mathcal{P}_A$                              | $0.5 \pm 0.25^\star, 1.25 \pm 0.25^\dagger$ |        | [1]    |
| [ $\mu\text{m}$ ]                           | minimum distance (between two different branches) to enforce anastomosis                                       | 40.                                         |        | [1]    |
| $R$ [ $\mu\text{m}$ ]                       | capillary lumen radius of original (host) vessels; range of $R$ for tumour vessels                             | $80.^\ddagger; 5.—60.$                      |        | [3, 4] |
| $h$ [ $\mu\text{m}$ ]                       | capillary wall thickness of original vessels; range of $h$ for tumour vessels                                  | $5.5^\ddagger; 3.—5.$                       |        | [3, 4] |
| $r_p$ [nm]                                  | capillary wall pore size of original vessels; average value of $r_p$ for tumour vessels                        | $1.^\ddagger; [10., 50., 150.]$             |        | [5, 6] |
| $\gamma_p$ [-]                              | fraction of endothelium surface occupied by pores for original vessels; value of $\gamma_p$ for tumour vessels | $1.e-4^\ddagger; 10.e-4$                    |        | [7]    |

#### References

1. Vavourakis V, Wijeratne PA, Shipley R, Loizidou M, Stylianopoulos T, Hawkes DJ. A Validated Multiscale In-Silico Model for Mechano-sensitive Tumour Angiogenesis and Growth. *PLOS Computational Biology*. 2017;13(1):e1005259. doi:10.1371/journal.pcbi.1005259.

- 
2. Wood LB, Ge R, Kamm RD, Asada HH. Nascent vessel elongation rate is inversely related to diameter in in vitro angiogenesis. *Integrative Biology*. 2012;4:3579–3600.
  3. Hashizume H, Baluk P, Morikawa S, McLean JW, Thurston G, Roberge S, et al. Openings between Defective Endothelial Cells Explain Tumor Vessel Leakiness. *The American Journal of Pathology*. 2000;156(4):1363–1380. doi:10.1016/S0002-9440(10)65006-7.
  4. Morikawa S, Baluk P, Kaidoh T, Haskell A, Jain RK, McDonald DM. Abnormalities in Pericytes on Blood Vessels and Endothelial Sprouts in Tumors. *The American Journal of Pathology*. 2002;160(3):985–1000. doi:10.1016/S0002-9440(10)64920-6.
  5. Sarin H. Physiologic upper limits of pore size of different blood capillary types and another perspective on the dual pore theory of microvascular permeability. *Journal of Angiogenesis Research*. 2010;2(1):1–19. doi:10.1186/2040-2384-2-14.
  6. Chauhan VP, Stylianopoulos T, Martin JD, Popovic Z, Chen O, Kamoun WS, et al. Normalization of tumour blood vessels improves the delivery of nanomedicines in a size-dependent manner. *Nature Nanotechnology*. 2012;7(6):383–388. doi:10.1038/nnano.2012.45.
  7. Jain RK, Tong RT, Munn LL. Effect of vascular normalization by antiangiogenic therapy on interstitial hypertension, peritumor edema, and lymphatic metastasis: Insights from a mathematical model. *Cancer Research*. 2007;67(6):2729–2735. doi:10.1158/0008-5472.CAN-06-4102.
