# Supplementary material for: In-silico dynamic analysis of cytotoxic drug administration to solid tumours: Effect of binding affinity and vessel permeability
Source: PubMed Central journal article supplement (PMC6193741; doi:10.1371/journal.pcbi.1006460), 2018-10-08
Supplement: pcbi.1006460.s023.pdf [file pcbi.1006460.s023.pdf]

## SUPPORTING INFORMATION

### In-silico Dynamic Analysis of Cytotoxic Drug Administration to Solid Tumours: Effect of Binding Affinity and Vessel Permeability

Vasileios Vavourakis, Triantafyllos Stylianopoulos, Peter A. Wijeratne

#### Biochemical and drug delivery model parameters

List of model parameters associated with the *Biochemical Solver Module* and the *Drug Delivery Solver Module* (see Fig 1). Cells marked with an asterisk denote shared values for both tissue types, while “NA” denotes non-applicable.

| Parameter                             | Description                                        | Host    | Tumour               | Source           |
|---------------------------------------|----------------------------------------------------|---------|----------------------|------------------|
| $\lambda_\epsilon$ [d <sup>-1</sup> ] | ECM remodelling rate                               | 8.64e-4 | 8.64e-1              | adapted from [1] |
| $\delta_\epsilon$ [d <sup>-1</sup> ]  | ECM degradation rate from MDEs                     | 7.465   | NA                   | [2]              |
| $\delta_d$ [d <sup>-1</sup> ]         | ECM degradation rate from drug                     | 0.      | 8.64e-2              | this work        |
| $\bar{\epsilon}$ [-]                  | ECM remodelling threshold                          | 0.33    | *                    | [2]              |
| $\bar{\epsilon}_d$ [-]                | ECM depletion threshold (due to drug), see Eq (13) | NA      | 0.1                  | this work        |
| $\bar{\epsilon}_i$ [-]                | see Eq (13)                                        | NA      | 0.01                 | this work        |
| $a_d$ [-]                             | see Eq (13)                                        | NA      | 2.5                  | this work        |
| $s_c$ [nm]                            | size of drug molecule, see Eq (9)                  | 1.      |                      |                  |
| $\tau_c$ [h]                          | half-life of the drug                              | 4.      |                      | this work        |
| $k_{on}$ [s <sup>-1</sup> ]           | drug association (affinity) rate                   | 0.      | 0.005, 0.05, 0.5, 5. | adapted from [3] |
| $k_{off}$ [s <sup>-1</sup> ]          | drug disassociation rate                           | 0.      | 1.e-4                | [3]              |
| $k_{int}$ [s <sup>-1</sup> ]          | drug internalisation rate                          | 0.      | 5.e-5                | [3]              |
| $\delta_b$ [s <sup>-1</sup> ]         | internalised drug decay rate                       | 0.      | 0.0864e-5            | this work        |

## References

1. Wood LB, Ge R, Kamm RD, Asada HH. Nascent vessel elongation rate is inversely related to diameter in in vitro angiogenesis. *Integrative Biology*. 2012;4:3579–3600.
2. Vavourakis V, Wijeratne PA, Shipley R, Loizidou M, Stylianopoulos T, Hawkes DJ. A Validated Multiscale In-Silico Model for Mechano-sensitive Tumour Angiogenesis and Growth. *PLOS Computational Biology*. 2017;13(1):e1005259. doi:10.1371/journal.pcbi.1005259.
3. Stylianopoulos T, Jain RK. Combining two strategies to improve perfusion and drug delivery in solid tumors. *Proceedings of the National Academy of Sciences of the United States of America*. 2013;110(46):18632–18637. doi:10.1073/pnas.1318415110.
