# Supplementary material for: In-silico dynamic analysis of cytotoxic drug administration to solid tumours: Effect of binding affinity and vessel permeability
Source: PubMed Central journal article supplement (PMC6193741; doi:10.1371/journal.pcbi.1006460), 2018-10-08
Supplement: pcbi.1006460.s024.pdf [file pcbi.1006460.s024.pdf]

---

## SUPPORTING INFORMATION

### In-silico Dynamic Analysis of Cytotoxic Drug Administration to Solid Tumours: Effect of Binding Affinity and Vessel Permeability

Vasileios Vavourakis, Triantafyllos Stylianopoulos, Peter A. Wijeratne

#### Solid mechanics model parameters

List of model parameters associated with the *Solid Solver Module* (see Fig 1). Cells marked with an asterisk denote shared values for both tissue types, while “NA” denotes non-applicable.

| Parameter                                   | Description                   | Host      | Tumour           | Source    |
|---------------------------------------------|-------------------------------|-----------|------------------|-----------|
| $\mu, \kappa$ [kPa]                         | Mooney-Rivlin model           | 10., 23.3 | 37.8, 50.4       | [1–3]     |
| $\alpha_g, \beta_g, \gamma_g, \delta_g$ [-] | isotropic growth parameters   | NA        | 3., 12.8, 6., 3. | [3]       |
| $a_w$ [-]                                   | structural integrity exponent | NA        | 1.               | this work |

#### References

1. Voutouri C, Mpekris F, Papageorgis P, Odysseos AD, Stylianopoulos T. Role of Constitutive Behavior and Tumor-Host Mechanical Interactions in the State of Stress and Growth of Solid Tumors. *PLoS ONE*. 2014;9(8):e104717. doi:10.1371/journal.pone.0104717.
2. Wijeratne PA, Vavourakis V, Hipwell JH, Voutouri C, Papageorgis P, Stylianopoulos T, et al. Multiscale modelling of solid tumour growth: the effect of collagen micromechanics. *Biomechanics and Modeling in Mechanobiology*. 2015; p. 1–12. doi:10.1007/s10237-015-0745-2.
3. Vavourakis V, Wijeratne PA, Shipley R, Loizidou M, Stylianopoulos T, Hawkes DJ. A Validated Multiscale In-Silico Model for Mechano-sensitive Tumour Angiogenesis and Growth. *PLOS Computational Biology*. 2017;13(1):e1005259. doi:10.1371/journal.pcbi.1005259.
